# Supplementary material
Source: PubMed Central journal article supplement (PMC6400290)
Supplement: NIHMS1506167-supplement-1.pdf [file NIHMS1506167-supplement-1.pdf]

Supplementary Table 1: The working group converged on 66 resources, which are shown here along with definitions and examples is available. The 66 resources were grouped into 16 categories under 6 major headings.

| Major heading                                                  | n  | Category                              | n  | Resource Names                              | Definition                                                                                                                                                                       | Detailed Examples                                                                                                                                       | Comments                                                                                                                                                                                                                                               |
|----------------------------------------------------------------|----|---------------------------------------|----|---------------------------------------------|----------------------------------------------------------------------------------------------------------------------------------------------------------------------------------|---------------------------------------------------------------------------------------------------------------------------------------------------------|--------------------------------------------------------------------------------------------------------------------------------------------------------------------------------------------------------------------------------------------------------|
| Application and support of clinical and translational research | 1  | Research/Regulatory Compliance        | 1  | Conflict of Interest                        | Informatics systems to capture and archive workforce conflict of interest                                                                                                        |                                                                                                                                                         |                                                                                                                                                                                                                                                        |
|                                                                |    |                                       | 2  | Electronic IRB                              | Support IRB operations and/or eIRB interfaces                                                                                                                                    |                                                                                                                                                         |                                                                                                                                                                                                                                                        |
|                                                                |    |                                       | 3  | Consent                                     | Centralized consent repository, e-consent model, research contact permission, biobank consents                                                                                   |                                                                                                                                                         |                                                                                                                                                                                                                                                        |
|                                                                |    |                                       | 4  | CT.gov registration process                 | Services for registration with ClinicalTrials.gov                                                                                                                                |                                                                                                                                                         |                                                                                                                                                                                                                                                        |
|                                                                |    |                                       | 5  | Public Access compliance tracking           | Services for monitoring that investigators are in compliance with public access policies for publications                                                                        |                                                                                                                                                         |                                                                                                                                                                                                                                                        |
|                                                                | 2  | Service Request/Fulfillment           | 6  | Service request system                      | Centralized system for capturing and fulfilling researcher needs                                                                                                                 | REDCap+API, SPARCrequest, other ticketing systems (e.g. Service Now, Kayako), WebCAMP, Jira                                                             |                                                                                                                                                                                                                                                        |
|                                                                |    |                                       | 7  | Resource navigation and inventory           | Web-based listing of resources, including ontology based systems                                                                                                                 | eagle-i, NUCore                                                                                                                                         |                                                                                                                                                                                                                                                        |
|                                                                |    |                                       | 8  | Service fulfillment system                  | Tracking of fulfillment and status                                                                                                                                               | SPARCrequest, REDCap+API, other ticketing system, NUCore, Taskmanager (for EDW reports and data steward approvals)                                      |                                                                                                                                                                                                                                                        |
|                                                                | 3  | Program Evaluation                    | 9  | Citation Capture and Service                | systems for tracking citation based metrics                                                                                                                                      | WebCAMP                                                                                                                                                 | Bill Trochim's group                                                                                                                                                                                                                                   |
|                                                                |    |                                       | 10 | Fulfillment Attribution                     | Fulfillment metrics dashboard                                                                                                                                                    | SPARCrequest, other                                                                                                                                     |                                                                                                                                                                                                                                                        |
|                                                                | 4  | Grants and Contracts Systems          | 11 | Electronic Grants and Contracts System      | systems for tracking grant applications, funding of faculty...                                                                                                                   | Coelus, Click (Huron) products                                                                                                                          | usually managed by office of vice-chancellor. Sometimes under research informatics, Childern's national: click product (at least API access is managed by Informatics)                                                                                 |
|                                                                |    |                                       | 12 | CTSA pilot grants                           | System for pilot grant applications, vouchers                                                                                                                                    | NU nitro competitions, UNC foundant, MUSC appsite, Vand Starbrite, Webcamp (e.g. Indiana), Childern's national: click product                           |                                                                                                                                                                                                                                                        |
|                                                                |    |                                       | 13 | Clinical Research Budgeting                 | Tools to help investigators with research charge capture and billing                                                                                                             | Oncore, SPARCrequest, other                                                                                                                             | Building a budget distinguishing between research and standard of care in your protocol                                                                                                                                                                |
|                                                                |    |                                       | 14 | Participant Payment Model                   | Tracking patient payements for participation in clinical trials                                                                                                                  | Nimblify                                                                                                                                                | Remuneration, E.g. Single visit or multi-visit study compensation                                                                                                                                                                                      |
|                                                                | 5  | CTMS components                       | 15 | Billing compliance                          | Adding layers/tools to enforce compliance in clinical billing systems                                                                                                            | Oncore at Yale, SPARCrequest MUSC                                                                                                                       | may include interfaces with EHR (Epic); note that the significant manual effort is done by billing departments to avoid in appropriate billing especially when a direct feed from the CTMS is not provided                                             |
|                                                                |    |                                       | 16 | Adverse events reporting                    | reporting and DSM review                                                                                                                                                         | Most CTMS's                                                                                                                                             |                                                                                                                                                                                                                                                        |
|                                                                |    |                                       | 17 | Investigator Initiated Studies              | Tools to enable data capture associated with small studies, including support for case report form design.                                                                       | E.g. Case report forms design (e.g. REDCap and OpenClinical/Oncore more controlled and 21CFR11)                                                         | single group / investigators                                                                                                                                                                                                                           |
|                                                                |    |                                       | 18 | Multicenter studies                         | Systems for collecting or managing research data as part of multi-site study coordination.                                                                                       | E.g. Clinical Trial coordinating centers                                                                                                                | multisite studies                                                                                                                                                                                                                                      |
|                                                                |    |                                       | 19 | Large studies                               | For very large research studies or networks, systems for data capture and integration at scale including those collected from multiple modalities (e.g. EMR, fitbit, PROs,...)   | E.g. trials conducted through large networks like PCORnet                                                                                               |                                                                                                                                                                                                                                                        |
|                                                                |    |                                       | 20 | 21CFR11 support                             | Services for technical compliance and documentation for 21CFR11 compliance and FDA audits                                                                                        | e.g. in CTMS or dedicated REDCap instance                                                                                                               |                                                                                                                                                                                                                                                        |
|                                                                |    |                                       | 21 | Patient Reported Outcomes (PRO)             | systems to capture report of the status of a patient's health/condition that comes directly from the patient                                                                     | PROMIS, REDCap support, interface with servers                                                                                                          | Note: special considerations when PROs are captured through the EMR                                                                                                                                                                                    |
|                                                                |    |                                       | 22 | Mobile app support                          | Supporting EDC on mobile platforms                                                                                                                                               |                                                                                                                                                         |                                                                                                                                                                                                                                                        |
|                                                                |    |                                       | 23 | Biobank or biorepository management systems | systems for specimen tracking, storage, retrieval.                                                                                                                               | e.g. Labvantage, caTissue, others                                                                                                                       |                                                                                                                                                                                                                                                        |
|                                                                |    |                                       | 8  | Data Repositories and EHR data              | 24                                                                                                                                                                               | Cohort exploration tools (self-service)                                                                                                                 | Tools that allow users to directly interface with the EHR data in a de-identified aggregate data manner and allows them to explore cohorts of patients before IRB approval for possible future recruitment or chart reviews in IRB approved protocols. |
|                                                                | 25 | IDR navigation/honest broker services |    |                                             | Tools and workflow to allow reseachers request identified data from IDR or DW administrators for IRB approved studies or for complex de-identified queries including query tools |                                                                                                                                                         |                                                                                                                                                                                                                                                        |
|                                                                | 26 | Analytics services                    |    |                                             | Concierge analytics or reusable libraries customized to your data store                                                                                                          |                                                                                                                                                         |                                                                                                                                                                                                                                                        |
|                                                                | 27 | Study specific integrated data        |    |                                             | Tools and personnel to support study specific integrated data repositories such as disease registries for research.                                                              | E.g. custom registries, advanced search mechanisms, dedicated personnel, may include searchers across multiple data sources e.g. biobanks, imaging data |                                                                                                                                                                                                                                                        |
|                                                                | 28 | Big data storage                      |    |                                             | storage infrastructure                                                                                                                                                           | e.g. hadoop, spark, Greenplum, HAWQ                                                                                                                     | Interfacing (ETL, EL), Analysis tools (SAS, R), Visualization tools (QlikView, Tableau, BO...                                                                                                                                                          |
|                                                                | 29 | Big data interfaces                   |    |                                             | ETL, EL                                                                                                                                                                          |                                                                                                                                                         |                                                                                                                                                                                                                                                        |
|                                                                | 30 | Analysis tools                        |    |                                             | Tools for analysis and analytics for investigators to use.                                                                                                                       | SAS, R, ...                                                                                                                                             |                                                                                                                                                                                                                                                        |

|                          |                                |    |                                                                                                                  |                                                                                                                                                                                                                                                                                                                             |                                                                                                                                                                                                                                                                                           |                                                                                                                                                                                                                                                                                                                                                                                                              |
|--------------------------|--------------------------------|----|------------------------------------------------------------------------------------------------------------------|-----------------------------------------------------------------------------------------------------------------------------------------------------------------------------------------------------------------------------------------------------------------------------------------------------------------------------|-------------------------------------------------------------------------------------------------------------------------------------------------------------------------------------------------------------------------------------------------------------------------------------------|--------------------------------------------------------------------------------------------------------------------------------------------------------------------------------------------------------------------------------------------------------------------------------------------------------------------------------------------------------------------------------------------------------------|
|                          |                                | 31 | Visualization tools                                                                                              | Tools for visualizing data from either big data platforms or data warehouses                                                                                                                                                                                                                                                | QlikView, Tableau, BO...                                                                                                                                                                                                                                                                  |                                                                                                                                                                                                                                                                                                                                                                                                              |
|                          |                                | 32 | Molecular Data Set                                                                                               | Next gen sequencing (NGS) or genomic data with requisite safeguards                                                                                                                                                                                                                                                         |                                                                                                                                                                                                                                                                                           |                                                                                                                                                                                                                                                                                                                                                                                                              |
|                          |                                | 33 | Imaging Data Set                                                                                                 | archival data, usally managed by imaging cores                                                                                                                                                                                                                                                                              | e.g. At Indiana XNAT research open source image management system for radiology                                                                                                                                                                                                           |                                                                                                                                                                                                                                                                                                                                                                                                              |
|                          |                                | 34 | Public Health Data Set                                                                                           | Access, navigation, analysis capacity to large public datasets                                                                                                                                                                                                                                                              | e.g. HCUP                                                                                                                                                                                                                                                                                 |                                                                                                                                                                                                                                                                                                                                                                                                              |
|                          |                                | 35 | Environmental Data Set                                                                                           | ...                                                                                                                                                                                                                                                                                                                         |                                                                                                                                                                                                                                                                                           |                                                                                                                                                                                                                                                                                                                                                                                                              |
|                          | 9                              | 36 | <b>Clinical Medical Information System (EHR systems research interface)</b><br>Research Related Decision Support |                                                                                                                                                                                                                                                                                                                             | E.g. PGx, interventional studies using EMRs                                                                                                                                                                                                                                               |                                                                                                                                                                                                                                                                                                                                                                                                              |
|                          |                                | 37 | Recruitment                                                                                                      | Alerts to recruit patients into ongoing studies                                                                                                                                                                                                                                                                             | e.g. powertrials in Cerner e.g. Indiana and Children's                                                                                                                                                                                                                                    |                                                                                                                                                                                                                                                                                                                                                                                                              |
|                          |                                | 38 | Research that utilizes the EMR                                                                                   | Development of research functionalities (alerts, decision support, research data collection tools)                                                                                                                                                                                                                          |                                                                                                                                                                                                                                                                                           |                                                                                                                                                                                                                                                                                                                                                                                                              |
|                          |                                | 39 | Interfaces with EHR                                                                                              | Implementation of interfaces from and to research systems such as CTMS, EDC, IRB                                                                                                                                                                                                                                            |                                                                                                                                                                                                                                                                                           |                                                                                                                                                                                                                                                                                                                                                                                                              |
|                          | 10                             | 40 | <b>Communication</b><br>Content collaboration                                                                    | e.g. Slack (like REDDIT for researchers or stack overflow) Tiaga: Conban; Confluence wiki                                                                                                                                                                                                                                   |                                                                                                                                                                                                                                                                                           |                                                                                                                                                                                                                                                                                                                                                                                                              |
|                          |                                | 41 | Project management                                                                                               | Systems for managing projects, tracking progress, and tickets                                                                                                                                                                                                                                                               | Tiaga: Conban; Jira; Confluence                                                                                                                                                                                                                                                           |                                                                                                                                                                                                                                                                                                                                                                                                              |
|                          |                                | 42 | Information/Service Portal                                                                                       | Researcher portals, service navigation                                                                                                                                                                                                                                                                                      |                                                                                                                                                                                                                                                                                           |                                                                                                                                                                                                                                                                                                                                                                                                              |
|                          |                                | 43 | Research Networking                                                                                              | Tools that enable allow researcher to create online bios and users to discover research expertise, identify potential collaborators or mentors, and assemble teams of collaborators.                                                                                                                                        | e.g. VIVO, Profiles, Elsevier Pure                                                                                                                                                                                                                                                        |                                                                                                                                                                                                                                                                                                                                                                                                              |
|                          |                                | 44 | Data publishing and data sharing plans                                                                           |                                                                                                                                                                                                                                                                                                                             |                                                                                                                                                                                                                                                                                           |                                                                                                                                                                                                                                                                                                                                                                                                              |
| Research collaboration   | Extramural data collaborations | 1  | Resources for participating in large networked collaborations                                                    | The technical and human resources required for participated in large networked collaborations such as clinical research data networks (CDRNs) or clinical trial recruitment networks. This also includes the ticketing and support groups to triage, prioritize, and approve such research projects.                        | E.g. TriNetX, SHRINE, PCORnet (i2b2, popmednet), Flatiron, Google,...                                                                                                                                                                                                                     | Technical infrastructure requirements are obvious: developers, servers, ... Non technical or personnel resources: for example project managers are needed to track that the components are in place and who would track all inbound data sharing requests to shepherd them through the governance process. Another example is time spent tracking and seeing business associate agreements for data sharing. |
|                          |                                | 2  | Back-end                                                                                                         | Building and maintaining components of the enterprise architecture to readily support extra mural collaborations. These components could include technical components (i2b2) or investments in converting native data to reference terminologies or data exchange standards.                                                | PCORnet CDM, i2b2 marts, OMOP CDM                                                                                                                                                                                                                                                         | Data analyst or DBA time that would need be dedicated to maintaining functional data marts.                                                                                                                                                                                                                                                                                                                  |
|                          |                                | 3  | Front-end provider facing                                                                                        | Implementing provider-facing interventions that are requirements for participating in large collaborations.                                                                                                                                                                                                                 | Multi-site pragmatic trial or decision support trial                                                                                                                                                                                                                                      | Epic resources. QA and testing. Training material. Feedback and approval from resource utilization committees, e.g. committees that oversee EMR decision support.                                                                                                                                                                                                                                            |
|                          |                                | 4  | Front-end patient facing?                                                                                        | Implementing patient-facing interventions or interfaces that requirements for participating in large collaborations                                                                                                                                                                                                         | When a healthcare enterprise partners with patient advocacy group or participates in a large national cohort recruitment effort like the PMI                                                                                                                                              | Epic or patient portal resources. Regulatory and legal compliance and verification.                                                                                                                                                                                                                                                                                                                          |
| Cyberinfrastructure      | Security                       | 1  | People/documentation/Training                                                                                    | E.g. CISO, IT security team, scanning software, providing documentation,                                                                                                                                                                                                                                                    |                                                                                                                                                                                                                                                                                           |                                                                                                                                                                                                                                                                                                                                                                                                              |
|                          |                                | 2  | Protecting privacy                                                                                               | Honest brokering, encryption, user rights                                                                                                                                                                                                                                                                                   |                                                                                                                                                                                                                                                                                           |                                                                                                                                                                                                                                                                                                                                                                                                              |
|                          |                                | 3  | Server security                                                                                                  | Encryption, network segmentation, technical controls                                                                                                                                                                                                                                                                        |                                                                                                                                                                                                                                                                                           |                                                                                                                                                                                                                                                                                                                                                                                                              |
|                          | IT infrastructure              | 4  | FISMA compliance                                                                                                 | Other regs?                                                                                                                                                                                                                                                                                                                 |                                                                                                                                                                                                                                                                                           |                                                                                                                                                                                                                                                                                                                                                                                                              |
|                          |                                | 5  | Servers                                                                                                          |                                                                                                                                                                                                                                                                                                                             |                                                                                                                                                                                                                                                                                           |                                                                                                                                                                                                                                                                                                                                                                                                              |
|                          |                                | 6  | Software licenses                                                                                                |                                                                                                                                                                                                                                                                                                                             |                                                                                                                                                                                                                                                                                           |                                                                                                                                                                                                                                                                                                                                                                                                              |
|                          |                                | 7  | Networks                                                                                                         |                                                                                                                                                                                                                                                                                                                             |                                                                                                                                                                                                                                                                                           |                                                                                                                                                                                                                                                                                                                                                                                                              |
| Oversight and governance | Governance                     | 1  | Standing IT governance committees or steering committees                                                         | Resources needed to ensure that staff with informatics knowledge and expertise can provide standing or ad hoc consultation and support for IT and Informatics governing bodies within the organization. This also includes time spent drafting and reviewing policies and SOPs for enforcement of compliance with policies. | e.g. EDW governance board, encryption and network firewall policies, appropriating tiered support to various campus groups, SOPs for security breach                                                                                                                                      |                                                                                                                                                                                                                                                                                                                                                                                                              |
|                          |                                | 2  | Regulatory operational support                                                                                   | The resources (technical or human) needed to enforce operational aspects of policies and regulations. These could include digital workflow support, audit, or approval components.                                                                                                                                          | e.g. data release approval mechanisms. e.g. some organizations may require that all REDCap projects requests need to be approved on a per-project basis, or that their data elements need to be audited to verify adherence to the HIPAA release authorization from the consent documents |                                                                                                                                                                                                                                                                                                                                                                                                              |
| Training and support     | Education                      | 1  | Seminars (Top Down?)                                                                                             | Workshops, symposia, and certificate programs in informatics and related competencies                                                                                                                                                                                                                                       |                                                                                                                                                                                                                                                                                           |                                                                                                                                                                                                                                                                                                                                                                                                              |
|                          |                                | 2  | Courses                                                                                                          | In person or online courses in informatics and related competencies                                                                                                                                                                                                                                                         | Online courses could include MOOC or in Moodle or other learning management systems.                                                                                                                                                                                                      |                                                                                                                                                                                                                                                                                                                                                                                                              |

|                                                 |                               |   |                                                   |                                                                                                                                                                                                                                                                                                                                                       |                                                                                                                                                                                                                                    |                                                                                                                 |
|-------------------------------------------------|-------------------------------|---|---------------------------------------------------|-------------------------------------------------------------------------------------------------------------------------------------------------------------------------------------------------------------------------------------------------------------------------------------------------------------------------------------------------------|------------------------------------------------------------------------------------------------------------------------------------------------------------------------------------------------------------------------------------|-----------------------------------------------------------------------------------------------------------------|
|                                                 |                               | 3 | In-app video training                             | Reference and educational content intended to be displayed in context of informatics systems                                                                                                                                                                                                                                                          | e.g. helper text (like text that appears when you hover over a question mark). How-tos ad FAQs. Includes text and multimedia. Reference to policies, regulations like explanation of HIPAA identifiers or Human Subjects Research. |                                                                                                                 |
|                                                 |                               | 4 | Regulatory training                               | Development of content for regulatory training as well as the infrastructure to administer, certify, and document training by organizational staff.                                                                                                                                                                                                   | e.g. CITI and GCP training. Integration with IRB systems or CTMS                                                                                                                                                                   |                                                                                                                 |
|                                                 |                               | 5 | One on one (Bottom up?)                           | Educational media and resources developed for one-on-one training and support                                                                                                                                                                                                                                                                         |                                                                                                                                                                                                                                    |                                                                                                                 |
|                                                 |                               |   |                                                   |                                                                                                                                                                                                                                                                                                                                                       |                                                                                                                                                                                                                                    |                                                                                                                 |
| <b>Methodological Research &amp; Innovation</b> | <b>Informatics innovation</b> | 1 | Faculty                                           | Resources committed to attract, employ and retain faculty who specialize in applied or foundational informatics methods.                                                                                                                                                                                                                              |                                                                                                                                                                                                                                    |                                                                                                                 |
|                                                 |                               | 2 | Student pipeline                                  | Resources committed to establish and sustain degree or other training programs                                                                                                                                                                                                                                                                        |                                                                                                                                                                                                                                    |                                                                                                                 |
|                                                 |                               | 3 | Software engineers/professional staff             | Investments in incentives and benefits to attract and retain highly skilled informatics professional staff                                                                                                                                                                                                                                            | e.g. Epic developers are at a premium, bioinformatics or data scientists who receive very attractive financial offers from industry                                                                                                | Todo: look for references quantifying the salary differentials and labor market attractiveness outside academia |
|                                                 |                               | 4 | Support for rapid prototyping and implementation. | Create and sustain infrastructure that is easily accessible to informatics professionals for rapid prototyping and evaluation of novel methods and systems with the intent of rapid agile deployment into enterprise-wide use. This could exist alongside or within the production systems that support the operations of an academic medical center. | e.g. access to EMR for testing of pharmacogenomic or novel predictive modeling in pilot areas.                                                                                                                                     |                                                                                                                 |

TOTAL:

66

### Supplementary Figure 1: Correlations between responses.

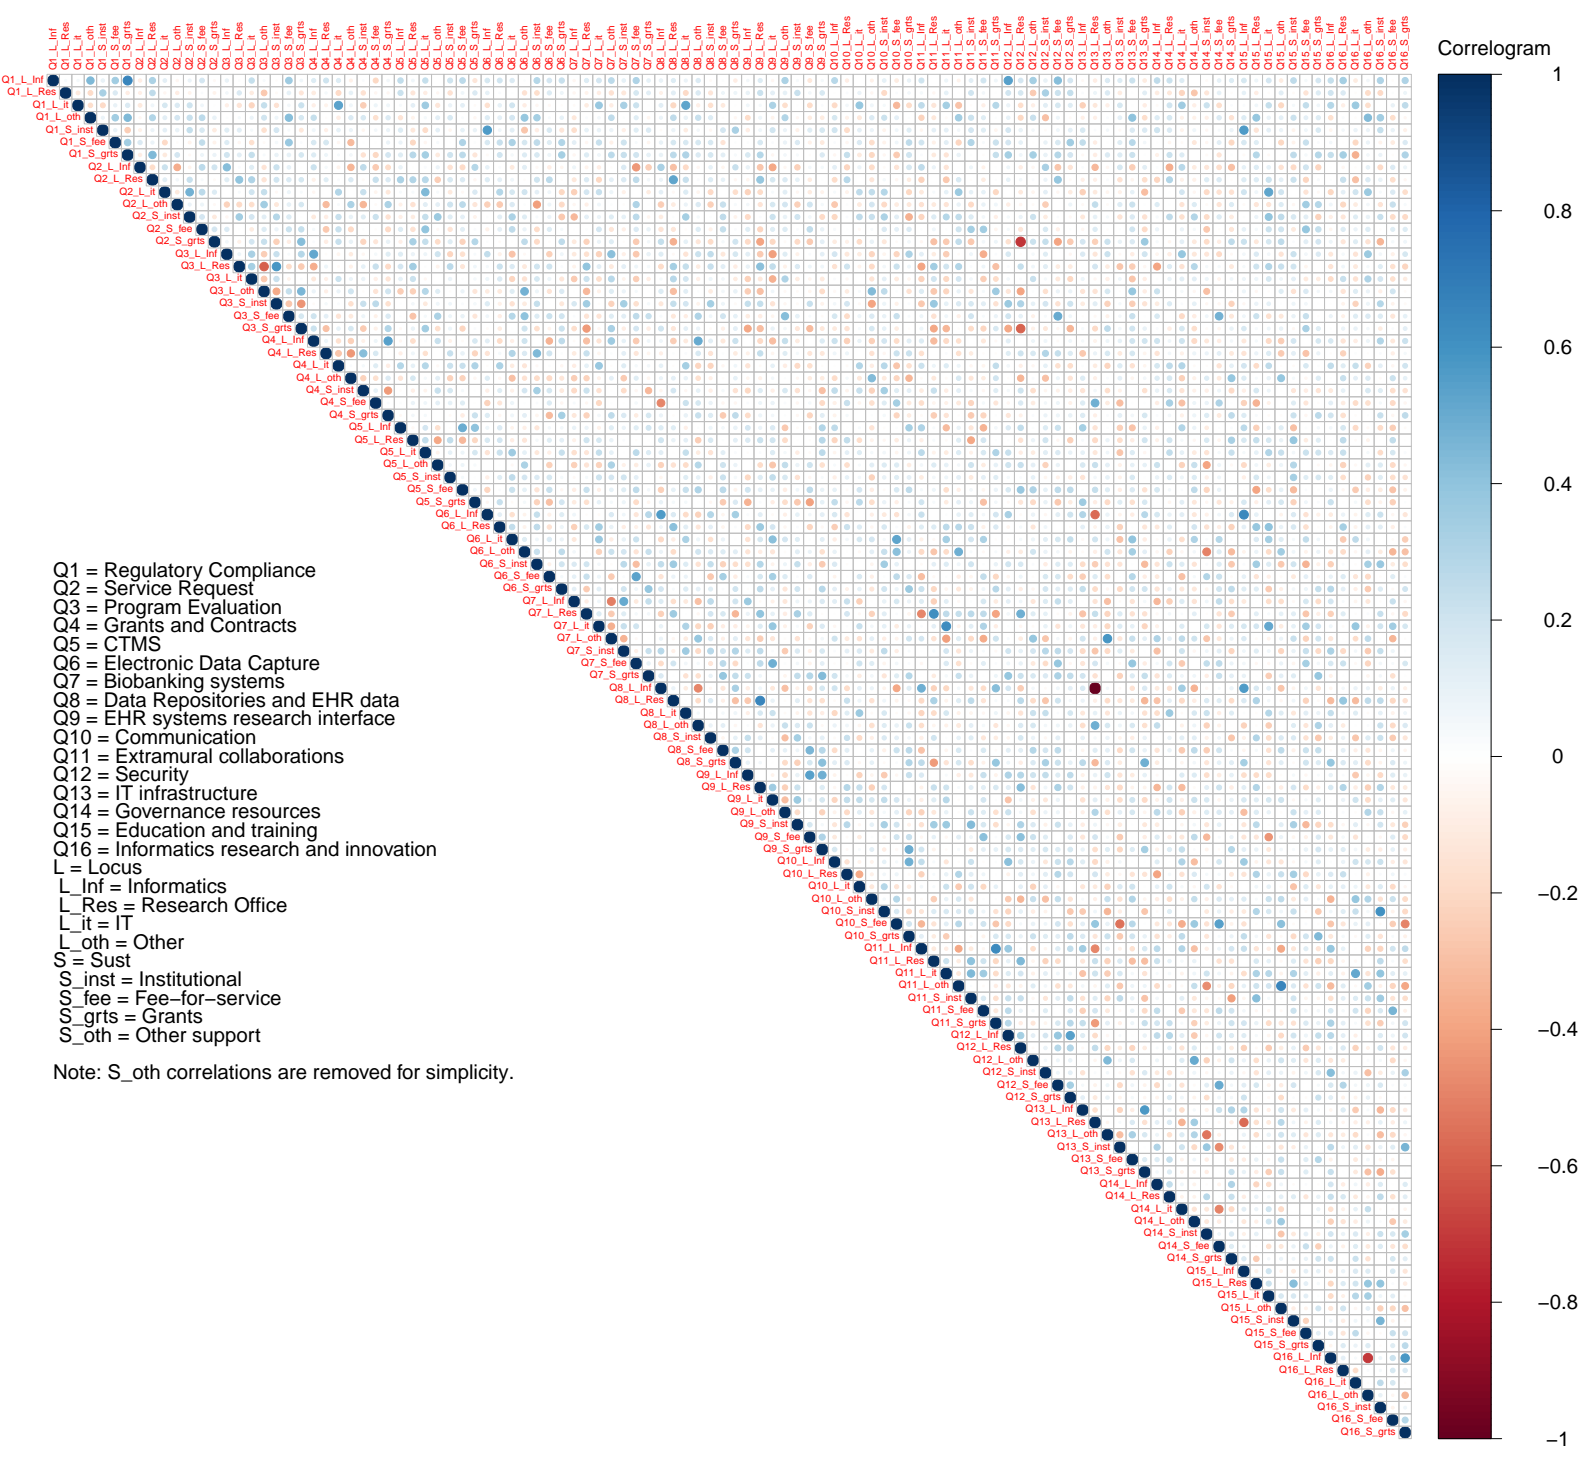

**Supplementary Tables (#2): includes correlation data, and frequencies of combinations of responses within each category for all 16 questions.**

### Legend

Q1 = Regulatory Compliance

Q2 = Service Request

Q3 = Program Evaluation

Q4 = Grants and Contracts

Q5 = CTMS

Q6 = Electronic Data Capture

Q7 = Biobanking systems

Q8 = Data Repositories and EHR data

Q9 = EHR systems research interface

Q10 = Communication

Q11 = Extramural collaborations

Q12 = Security

Q13 = IT infrastructure

Q14 = Governance resources

Q15 = Education and training

Q16 = Informatics research and innovation

| Abbr   | Description    |                 |
|--------|----------------|-----------------|
| L_Inf  | Locus          | Informatics     |
| L_Res  | Locus          | Research Office |
| L_it   | Locus          | IT              |
| L_oth  | Locus          | Other           |
| S_inst | Sustainability | Institutional   |
| S_fee  | Sustainability | Fee-for-service |
| S_grts | Sustainability | Grants          |
| S_oth  | Sustainability | Other support   |

**Sheet 2: Raw data of responses.**

**Sheet 3: Correlation data sorted in descending order. Filtered to results within the same component. S\_oth correlations filtered out for simplicity.**

**Sheets 4 onward show frequencies of combinations of responses within each category for all 16 categories.**

| id | Q1_L_Inf | Q1_L_Res | Q1_L_it | Q1_L_oth | Q1_S_inst | Q1_S_fee | Q1_S_grts |
|----|----------|----------|---------|----------|-----------|----------|-----------|
| 1  | 1        | 0        | 0       | 0        | 1         | 0        | 1         |
| 2  | 1        | 1        | 1       | 1        | 1         | 1        | 1         |
| 3  | 0        | 1        | 0       | 0        | 1         | 0        | 0         |
| 4  | 0        | 1        | 0       | 0        | 1         | 0        | 0         |
| 5  | 0        | 1        | 1       | 0        | 1         | 0        | 0         |
| 8  | 1        | 1        | 0       | 0        | 1         | 0        | 1         |
| 9  | 0        | 0        | 1       | 0        | 1         | 0        | 0         |
| 10 | 0        | 1        | 1       | 0        | 1         | 0        | 0         |
| 11 | 1        | 1        | 0       | 1        | 1         | 1        | 0         |
| 12 | 0        | 1        | 1       | 0        | 1         | 0        | 0         |
| 13 | 0        | 1        | 0       | 0        | 1         | 0        | 0         |
| 15 | 0        | 1        | 0       | 0        | 1         | 1        | 0         |
| 16 | 1        | 1        | 1       | 0        | 1         | 0        | 1         |
| 17 | 1        | 0        | 0       | 1        | 1         | 1        | 1         |
| 18 | 0        | 1        | 0       | 0        | 1         | 0        | 0         |
| 21 | 0        | 1        | 0       | 0        | 1         | 0        | 0         |
| 22 | 1        | 1        | 0       | 1        | 1         | 1        | 1         |
| 23 | 1        | 1        | 1       | 0        | 1         | 0        | 0         |
| 28 | 0        | 1        | 0       | 0        | 1         | 0        | 0         |
| 30 | 1        | 1        | 1       | 0        | 1         | 1        | 1         |
| 32 | 0        | 0        | 1       | 0        | 1         | 0        | 0         |
| 33 | 0        | 1        | 0       | 0        | 1         | 0        | 0         |
| 36 | 0        | 1        | 0       | 0        | 1         | 0        | 0         |
| 41 | 1        | 1        | 1       | 1        | 1         | 1        | 1         |
| 42 | 1        | 1        | 0       | 0        | 1         | 0        | 0         |
| 45 | 0        | 1        | 0       | 0        | 1         | 0        | 0         |
| 46 | 0        | 0        | 0       | 1        | 1         | 0        | 0         |
| 47 | 0        | 1        | 1       | 0        | 1         | 0        | 0         |
| 53 | 1        | 1        | 0       | 1        | 1         | 0        | 1         |
| 54 | 0        | 1        | 0       | 1        | 1         | 0        | 1         |
| 56 | 0        | 1        | 0       | 0        | 1         | 0        | 0         |
| 57 | 0        | 1        | 1       | 0        | 1         | 1        | 0         |
| 58 | 0        | 1        | 0       | 0        | 1         | 0        | 0         |
| 59 | 0        | 1        | 1       | 0        | 1         | 0        | 0         |
| 65 | 0        | 1        | 1       | 0        | 1         | 1        | 1         |
| 69 | 0        | 1        | 0       | 0        | 1         | 0        | 0         |

**Correlation data sorted in descending order. Filtered to results within the same component. S\_oth correlations filtered out**

| <b>v1</b>                                    | <b>v2</b>                                     | <b>corr</b> | <b>p</b> |
|----------------------------------------------|-----------------------------------------------|-------------|----------|
| 1-Regulatory Compliance_L_Inf                | 1-Regulatory Compliance_S_grts                | 0.65        | 3.2E-06  |
| 11-Extramural collaborations_L_Inf           | 11-Extramural collaborations_S_grts           | 0.632118072 | 7.1E-06  |
| 3-Program Evaluation_L_Res                   | 3-Program Evaluation_S_inst                   | 0.581176471 | 5.4E-05  |
| 13-IT infrastructure_L_Inf                   | 13-IT infrastructure_S_grts                   | 0.572077554 | 7.6E-05  |
| 16-Informatics research and innovation_L_Inf | 16-Informatics research and innovation_S_grts | 0.570610361 | 8E-05    |
| 9-EHR systems research interface_L_Inf       | 9-EHR systems research interface_S_fee        | 0.547722558 | 0.00017  |
| 12-Security_L_Inf                            | 12-Security_S_grts                            | 0.545086545 | 0.00019  |
| 4-Grants and Contracts_L_Inf                 | 4-Grants and Contracts_S_grts                 | 0.544949261 | 0.00019  |
| 7-Biobanking systems_L_Inf                   | 7-Biobanking systems_S_inst                   | 0.508086778 | 0.00059  |
| 5-CTMS_L_Inf                                 | 5-CTMS_S_fee                                  | 0.495968799 | 0.00084  |
| 9-EHR systems research interface_L_Inf       | 9-EHR systems research interface_S_grts       | 0.484071217 | 0.00116  |
| 10-Communication_L_Inf                       | 10-Communication_S_grts                       | 0.48121774  | 0.00125  |
| 2-Service Request_L_it                       | 2-Service Request_S_inst                      | 0.473432076 | 0.00154  |
| 3-Program Evaluation_L_oth                   | 3-Program Evaluation_S_grts                   | 0.45344929  | 0.00256  |
| 11-Extramural collaborations_L_it            | 11-Extramural collaborations_S_inst           | 0.444675866 | 0.00317  |
| 1-Regulatory Compliance_L_Inf                | 1-Regulatory Compliance_L_oth                 | 0.440385506 | 0.00352  |
| 1-Regulatory Compliance_L_oth                | 1-Regulatory Compliance_S_grts                | 0.440385506 | 0.00352  |
| 15-Education and training_L_Res              | 15-Education and training_S_inst              | 0.428174419 | 0.00467  |
| 4-Grants and Contracts_L_Res                 | 4-Grants and Contracts_S_inst                 | 0.423586871 | 0.00519  |
| 11-Extramural collaborations_L_Res           | 11-Extramural collaborations_S_inst           | 0.40824829  | 0.00728  |
| 5-CTMS_L_Inf                                 | 5-CTMS_S_grts                                 | 0.407899863 | 0.00733  |
| 12-Security_L_Inf                            | 12-Security_S_fee                             | 0.387298335 | 0.01128  |
| 9-EHR systems research interface_L_it        | 9-EHR systems research interface_S_inst       | 0.368629908 | 0.0163   |
| 11-Extramural collaborations_L_it            | 11-Extramural collaborations_S_fee            | 0.358609569 | 0.0197   |
| 9-EHR systems research interface_L_it        | 9-EHR systems research interface_L_Res        | 0.350823208 | 0.02273  |
| 1-Regulatory Compliance_L_oth                | 1-Regulatory Compliance_S_fee                 | 0.348792843 | 0.02358  |
| 1-Regulatory Compliance_L_Inf                | 1-Regulatory Compliance_S_fee                 | 0.342493873 | 0.0264   |
| 1-Regulatory Compliance_S_fee                | 1-Regulatory Compliance_S_grts                | 0.342493873 | 0.0264   |
| 3-Program Evaluation_L_it                    | 3-Program Evaluation_L_Res                    | 0.336336397 | 0.02942  |
| 12-Security_L_Inf                            | 12-Security_L_Res                             | 0.334719341 | 0.03026  |
| 12-Security_S_fee                            | 12-Security_S_grts                            | 0.333333333 | 0.03099  |
| 13-IT infrastructure_L_oth                   | 13-IT infrastructure_S_fee                    | 0.324442842 | 0.03606  |
| 1-Regulatory Compliance_L_Res                | 1-Regulatory Compliance_S_inst                | 0.321960458 | 0.03759  |
| 8-Data Repositories and EHR data_L_Inf       | 8-Data Repositories and EHR data_S_grts       | 0.321960458 | 0.03759  |
| 3-Program Evaluation_L_Inf                   | 3-Program Evaluation_L_it                     | 0.320256308 | 0.03867  |
| 8-Data Repositories and EHR data_S_fee       | 8-Data Repositories and EHR data_S_grts       | 0.315063019 | 0.04212  |
| 9-EHR systems research interface_S_fee       | 9-EHR systems research interface_S_grts       | 0.303802497 | 0.05047  |
| 14-Governance resources_L_Inf                | 14-Governance resources_S_grts                | 0.3         | 0.05357  |
| 12-Security_L_Res                            | 12-Security_S_grts                            | 0.298556197 | 0.05479  |
| 16-Informatics research and innovation_S_fee | 16-Informatics research and innovation_S_grts | 0.28894889  | 0.06347  |
| 10-Communication_L_it                        | 10-Communication_S_inst                       | 0.288675135 | 0.06373  |
| 10-Communication_L_oth                       | 10-Communication_S_fee                        | 0.284267622 | 0.06807  |
| 3-Program Evaluation_L_Inf                   | 3-Program Evaluation_S_grts                   | 0.283069259 | 0.0693   |
| 12-Security_L_Res                            | 12-Security_S_fee                             | 0.282842712 | 0.06953  |

| Informatics | ResearchOffi | IT | Other | Freq |
|-------------|--------------|----|-------|------|
| 0           | 0            | 0  | 0     | 0    |
| 1           | 0            | 0  | 0     | 1    |
| 0           | 1            | 0  | 0     | 16   |
| 1           | 1            | 0  | 0     | 2    |
| 0           | 0            | 1  | 0     | 4    |
| 1           | 0            | 1  | 0     | 0    |
| 0           | 1            | 1  | 0     | 7    |
| 1           | 1            | 1  | 0     | 3    |
| 0           | 0            | 0  | 1     | 2    |
| 1           | 0            | 0  | 1     | 1    |
| 0           | 1            | 0  | 1     | 1    |
| 1           | 1            | 0  | 1     | 3    |
| 0           | 0            | 1  | 1     | 0    |
| 1           | 0            | 1  | 1     | 0    |
| 0           | 1            | 1  | 1     | 0    |
| 1           | 1            | 1  | 1     | 2    |

Locus of Control

| Institutional | Fees | Grants | Other | Freq |
|---------------|------|--------|-------|------|
| 0             | 0    | 0      | 0     | 0    |
| 1             | 0    | 0      | 0     | 25   |
| 0             | 1    | 0      | 0     | 0    |
| 1             | 1    | 0      | 0     | 5    |
| 0             | 0    | 1      | 0     | 1    |
| 1             | 0    | 1      | 0     | 5    |
| 0             | 1    | 1      | 0     | 0    |
| 1             | 1    | 1      | 0     | 5    |
| 0             | 0    | 0      | 1     | 0    |
| 1             | 0    | 0      | 1     | 0    |
| 0             | 1    | 0      | 1     | 0    |
| 1             | 1    | 0      | 1     | 0    |
| 0             | 0    | 1      | 1     | 0    |
| 1             | 0    | 1      | 1     | 0    |
| 0             | 1    | 1      | 1     | 0    |
| 1             | 1    | 1      | 1     | 1    |

Sustainability Sources



| Informatics | ResearchOffi | IT | Other | Freq |
|-------------|--------------|----|-------|------|
| 0           | 0            | 0  | 0     | 1    |
| 1           | 0            | 0  | 0     | 15   |
| 0           | 1            | 0  | 0     | 1    |
| 1           | 1            | 0  | 0     | 2    |
| 0           | 0            | 1  | 0     | 1    |
| 1           | 0            | 1  | 0     | 7    |
| 0           | 1            | 1  | 0     | 0    |
| 1           | 1            | 1  | 0     | 3    |
| 0           | 0            | 0  | 1     | 3    |
| 1           | 0            | 0  | 1     | 4    |
| 0           | 1            | 0  | 1     | 2    |
| 1           | 1            | 0  | 1     | 0    |
| 0           | 0            | 1  | 1     | 0    |
| 1           | 0            | 1  | 1     | 2    |
| 0           | 1            | 1  | 1     | 0    |
| 1           | 1            | 1  | 1     | 1    |

Locus of Control

| Institutional | Fees | Grants | Other | Freq |
|---------------|------|--------|-------|------|
| 0             | 0    | 0      | 0     | 1    |
| 1             | 0    | 0      | 0     | 7    |
| 0             | 1    | 0      | 0     | 2    |
| 1             | 1    | 0      | 0     | 3    |
| 0             | 0    | 1      | 0     | 7    |
| 1             | 0    | 1      | 0     | 5    |
| 0             | 1    | 1      | 0     | 3    |
| 1             | 1    | 1      | 0     | 14   |

Sustainability Sources

| Informatics | ResearchOffi | IT | Other | Freq |
|-------------|--------------|----|-------|------|
| 0           | 0            | 0  | 0     | 2    |
| 1           | 0            | 0  | 0     | 5    |
| 0           | 1            | 0  | 0     | 8    |
| 1           | 1            | 0  | 0     | 4    |
| 0           | 0            | 1  | 0     | 0    |
| 1           | 0            | 1  | 0     | 0    |
| 0           | 1            | 1  | 0     | 0    |
| 1           | 1            | 1  | 0     | 3    |
| 0           | 0            | 0  | 1     | 13   |
| 1           | 0            | 0  | 1     | 5    |
| 0           | 1            | 0  | 1     | 1    |
| 1           | 1            | 0  | 1     | 1    |
| 0           | 0            | 1  | 1     | 0    |
| 1           | 0            | 1  | 1     | 0    |
| 0           | 1            | 1  | 1     | 0    |
| 1           | 1            | 1  | 1     | 0    |

Locus of Control

| Institutional | Fees | Grants | Other | Freq |
|---------------|------|--------|-------|------|
| 0             | 0    | 0      | 0     | 2    |
| 1             | 0    | 0      | 0     | 13   |
| 0             | 1    | 0      | 0     | 0    |
| 1             | 1    | 0      | 0     | 0    |
| 0             | 0    | 1      | 0     | 13   |
| 1             | 0    | 1      | 0     | 11   |
| 0             | 1    | 1      | 1     | 1    |
| 1             | 1    | 1      | 1     | 0    |
| 0             | 0    | 0      | 1     | 0    |
| 1             | 0    | 0      | 1     | 1    |
| 0             | 1    | 0      | 1     | 0    |
| 1             | 1    | 0      | 1     | 0    |
| 0             | 0    | 1      | 1     | 0    |
| 1             | 0    | 1      | 1     | 0    |
| 0             | 1    | 1      | 1     | 1    |
| 1             | 1    | 1      | 1     | 0    |

Sustainability Sources

| Informatics | ResearchOffi | IT | Other | Freq |
|-------------|--------------|----|-------|------|
| 0           | 0            | 0  | 0     | 1    |
| 1           | 0            | 0  | 0     | 1    |
| 0           | 1            | 0  | 0     | 16   |
| 1           | 1            | 0  | 0     | 5    |
| 0           | 0            | 1  | 0     | 2    |
| 1           | 0            | 1  | 0     | 0    |
| 0           | 1            | 1  | 0     | 7    |
| 1           | 1            | 1  | 0     | 1    |
| 0           | 0            | 0  | 1     | 2    |
| 1           | 0            | 0  | 1     | 0    |
| 0           | 1            | 0  | 1     | 4    |
| 1           | 1            | 0  | 1     | 0    |
| 0           | 0            | 1  | 1     | 3    |
| 1           | 0            | 1  | 1     | 0    |
| 0           | 1            | 1  | 1     | 0    |
| 1           | 1            | 1  | 1     | 0    |

Locus of Control

| Institutional | Fees | Grants | Other | Freq |
|---------------|------|--------|-------|------|
| 0             | 0    | 0      | 0     | 1    |
| 1             | 0    | 0      | 0     | 29   |
| 0             | 1    | 0      | 0     | 0    |
| 1             | 1    | 0      | 0     | 3    |
| 0             | 0    | 1      | 0     | 2    |
| 1             | 0    | 1      | 0     | 4    |
| 0             | 1    | 1      | 0     | 0    |
| 1             | 1    | 1      | 0     | 1    |
| 0             | 0    | 0      | 1     | 0    |
| 1             | 0    | 0      | 1     | 0    |
| 0             | 1    | 0      | 1     | 0    |
| 1             | 1    | 0      | 1     | 0    |
| 0             | 0    | 1      | 1     | 1    |
| 1             | 0    | 1      | 1     | 1    |
| 0             | 1    | 1      | 1     | 0    |
| 1             | 1    | 1      | 1     | 0    |

Sustainability Sources

| Informatics | ResearchOffice | IT | Other | Freq |
|-------------|----------------|----|-------|------|
| 0           | 0              | 0  | 0     | 0    |
| 1           | 0              | 0  | 0     | 5    |
| 0           | 1              | 0  | 0     | 7    |
| 1           | 1              | 0  | 0     | 4    |
| 0           | 0              | 1  | 1     | 1    |
| 1           | 0              | 1  | 1     | 1    |
| 0           | 1              | 1  | 1     | 5    |
| 1           | 1              | 1  | 1     | 5    |
| 0           | 0              | 0  | 1     | 7    |
| 1           | 0              | 0  | 1     | 0    |
| 0           | 1              | 0  | 1     | 1    |
| 1           | 1              | 0  | 1     | 1    |
| 0           | 0              | 1  | 1     | 0    |
| 1           | 0              | 1  | 1     | 2    |
| 0           | 1              | 1  | 1     | 1    |
| 1           | 1              | 1  | 1     | 2    |

Locus of Control

| Institutional | Fees | Grants | Other | Freq |
|---------------|------|--------|-------|------|
| 0             | 0    | 0      | 0     | 1    |
| 1             | 0    | 0      | 0     | 20   |
| 0             | 1    | 0      | 0     | 1    |
| 1             | 1    | 0      | 0     | 6    |
| 0             | 0    | 1      | 1     | 1    |
| 1             | 0    | 1      | 1     | 6    |
| 0             | 1    | 1      | 1     | 0    |
| 1             | 1    | 1      | 1     | 4    |
| 0             | 0    | 0      | 0     | 1    |
| 1             | 0    | 0      | 0     | 0    |
| 0             | 1    | 0      | 1     | 0    |
| 1             | 1    | 0      | 1     | 2    |
| 0             | 0    | 1      | 1     | 0    |
| 1             | 0    | 1      | 1     | 0    |
| 0             | 1    | 1      | 1     | 0    |
| 1             | 1    | 1      | 1     | 0    |

Sustainability Sources

| Informatics | ResearchOffi | IT | Other | Freq |
|-------------|--------------|----|-------|------|
| 0           | 0            | 0  | 0     | 0    |
| 1           | 0            | 0  | 0     | 19   |
| 0           | 1            | 0  | 0     | 0    |
| 1           | 1            | 0  | 0     | 2    |
| 0           | 0            | 1  | 0     | 2    |
| 1           | 0            | 1  | 0     | 6    |
| 0           | 1            | 1  | 0     | 0    |
| 1           | 1            | 1  | 0     | 3    |
| 0           | 0            | 0  | 1     | 1    |
| 1           | 0            | 0  | 1     | 4    |
| 0           | 1            | 0  | 1     | 0    |
| 1           | 1            | 0  | 1     | 0    |
| 0           | 0            | 1  | 1     | 0    |
| 1           | 0            | 1  | 1     | 4    |
| 0           | 1            | 1  | 1     | 0    |
| 1           | 1            | 1  | 1     | 1    |

Locus of Control

| Institutional | Fees | Grants | Other | Freq |
|---------------|------|--------|-------|------|
| 0             | 0    | 0      | 0     | 2    |
| 1             | 0    | 0      | 0     | 7    |
| 0             | 1    | 0      | 0     | 5    |
| 1             | 1    | 0      | 0     | 4    |
| 0             | 0    | 1      | 0     | 3    |
| 1             | 0    | 1      | 0     | 8    |
| 0             | 1    | 1      | 0     | 2    |
| 1             | 1    | 1      | 0     | 10   |
| 0             | 0    | 0      | 1     | 0    |
| 1             | 0    | 0      | 1     | 0    |
| 0             | 1    | 0      | 1     | 0    |
| 1             | 1    | 0      | 1     | 0    |
| 0             | 0    | 1      | 1     | 0    |
| 1             | 0    | 1      | 1     | 0    |
| 0             | 1    | 1      | 1     | 0    |
| 1             | 1    | 1      | 1     | 1    |

Sustainability Sources

| Informatics | ResearchOffi | IT | Other | Freq |
|-------------|--------------|----|-------|------|
| 0           | 0            | 0  | 0     | 2    |
| 1           | 0            | 0  | 0     | 11   |
| 0           | 1            | 0  | 0     | 5    |
| 1           | 1            | 0  | 0     | 2    |
| 0           | 0            | 1  | 0     | 4    |
| 1           | 0            | 1  | 0     | 3    |
| 0           | 1            | 1  | 0     | 2    |
| 1           | 1            | 1  | 0     | 3    |
| 0           | 0            | 0  | 1     | 9    |
| 1           | 0            | 0  | 1     | 0    |
| 0           | 1            | 0  | 1     | 1    |
| 1           | 1            | 0  | 1     | 0    |
| 0           | 0            | 1  | 1     | 0    |
| 1           | 0            | 1  | 1     | 0    |
| 0           | 1            | 1  | 1     | 0    |
| 1           | 1            | 1  | 1     | 0    |

Locus of Control

| Institutional | Fees | Grants | Other | Freq |
|---------------|------|--------|-------|------|
| 0             | 0    | 0      | 0     | 1    |
| 1             | 0    | 0      | 0     | 10   |
| 0             | 1    | 0      | 0     | 3    |
| 1             | 1    | 0      | 0     | 4    |
| 0             | 0    | 1      | 0     | 2    |
| 1             | 0    | 1      | 0     | 9    |
| 0             | 1    | 1      | 0     | 1    |
| 1             | 1    | 1      | 0     | 8    |
| 0             | 0    | 0      | 1     | 2    |
| 1             | 0    | 0      | 1     | 0    |
| 0             | 1    | 0      | 1     | 1    |
| 1             | 1    | 0      | 1     | 0    |
| 0             | 0    | 1      | 1     | 0    |
| 1             | 0    | 1      | 1     | 0    |
| 0             | 1    | 1      | 1     | 0    |
| 1             | 1    | 1      | 1     | 1    |

Sustainability Sources

| Informatics | ResearchOffi | IT | Other | Freq |
|-------------|--------------|----|-------|------|
| 0           | 0            | 0  | 0     | 0    |
| 1           | 0            | 0  | 0     | 9    |
| 0           | 1            | 0  | 0     | 0    |
| 1           | 1            | 0  | 0     | 3    |
| 0           | 0            | 1  | 0     | 0    |
| 1           | 0            | 1  | 0     | 19   |
| 0           | 1            | 1  | 0     | 0    |
| 1           | 1            | 1  | 0     | 7    |
| 0           | 0            | 0  | 1     | 0    |
| 1           | 0            | 0  | 1     | 1    |
| 0           | 1            | 0  | 1     | 0    |
| 1           | 1            | 0  | 1     | 0    |
| 0           | 0            | 1  | 1     | 1    |
| 1           | 0            | 1  | 1     | 2    |
| 0           | 1            | 1  | 1     | 0    |
| 1           | 1            | 1  | 1     | 0    |

Locus of Control

| Institutional | Fees | Grants | Other | Freq |
|---------------|------|--------|-------|------|
| 0             | 0    | 0      | 0     | 1    |
| 1             | 0    | 0      | 0     | 5    |
| 0             | 1    | 0      | 0     | 0    |
| 1             | 1    | 0      | 0     | 2    |
| 0             | 0    | 1      | 0     | 0    |
| 1             | 0    | 1      | 0     | 12   |
| 0             | 1    | 1      | 0     | 2    |
| 1             | 1    | 1      | 0     | 18   |
| 0             | 0    | 0      | 1     | 0    |
| 1             | 0    | 0      | 1     | 0    |
| 0             | 1    | 0      | 1     | 0    |
| 1             | 1    | 0      | 1     | 0    |
| 0             | 0    | 1      | 1     | 0    |
| 1             | 0    | 1      | 1     | 0    |
| 0             | 1    | 1      | 1     | 0    |
| 1             | 1    | 1      | 1     | 2    |

Sustainability Sources

| Informatics | ResearchOffice | IT | Other | Freq |
|-------------|----------------|----|-------|------|
| 0           | 0              | 0  | 0     | 1    |
| 1           | 0              | 0  | 0     | 9    |
| 0           | 1              | 0  | 0     | 0    |
| 1           | 1              | 0  | 0     | 0    |
| 0           | 0              | 1  | 1     | 5    |
| 1           | 0              | 1  | 1     | 11   |
| 0           | 1              | 1  | 1     | 2    |
| 1           | 1              | 1  | 1     | 5    |
| 0           | 0              | 0  | 1     | 3    |
| 1           | 0              | 0  | 1     | 3    |
| 0           | 1              | 0  | 1     | 0    |
| 1           | 1              | 0  | 1     | 0    |
| 0           | 0              | 1  | 1     | 1    |
| 1           | 0              | 1  | 1     | 2    |
| 0           | 1              | 1  | 1     | 0    |
| 1           | 1              | 1  | 1     | 0    |

Locus of Control

| Institutional Fees | Grants | Other | Freq |
|--------------------|--------|-------|------|
| 0                  | 0      | 0     | 1    |
| 1                  | 0      | 0     | 12   |
| 0                  | 1      | 0     | 2    |
| 1                  | 1      | 0     | 3    |
| 0                  | 0      | 1     | 3    |
| 1                  | 0      | 1     | 6    |
| 0                  | 1      | 1     | 0    |
| 1                  | 1      | 1     | 11   |
| 0                  | 0      | 0     | 1    |
| 1                  | 0      | 0     | 0    |
| 0                  | 1      | 0     | 0    |
| 1                  | 1      | 0     | 0    |
| 0                  | 0      | 1     | 1    |
| 1                  | 0      | 1     | 0    |
| 0                  | 1      | 1     | 0    |
| 1                  | 1      | 1     | 2    |

Sustainability Sources



| Informatics | ResearchOffice | IT | Other | Freq |
|-------------|----------------|----|-------|------|
| 0           | 0              | 0  | 0     | 1    |
| 1           | 0              | 0  | 0     | 8    |
| 0           | 1              | 0  | 0     | 6    |
| 1           | 1              | 0  | 0     | 6    |
| 0           | 0              | 1  | 1     | 4    |
| 1           | 0              | 1  | 0     | 6    |
| 0           | 1              | 1  | 1     | 1    |
| 1           | 1              | 1  | 1     | 1    |
| 0           | 0              | 0  | 1     | 2    |
| 1           | 0              | 0  | 1     | 2    |
| 0           | 1              | 0  | 1     | 1    |
| 1           | 1              | 0  | 1     | 2    |
| 0           | 0              | 1  | 1     | 1    |
| 1           | 0              | 1  | 1     | 1    |
| 0           | 1              | 1  | 1     | 0    |
| 1           | 1              | 1  | 1     | 0    |

Locus of Control

| Institutional Fees | Grants | Other | Freq |
|--------------------|--------|-------|------|
| 0                  | 0      | 0     | 2    |
| 1                  | 0      | 0     | 19   |
| 0                  | 1      | 0     | 0    |
| 1                  | 1      | 0     | 2    |
| 0                  | 0      | 1     | 4    |
| 1                  | 0      | 1     | 10   |
| 0                  | 1      | 1     | 0    |
| 1                  | 1      | 1     | 3    |
| 0                  | 0      | 0     | 0    |
| 1                  | 0      | 0     | 1    |
| 0                  | 1      | 0     | 0    |
| 1                  | 1      | 0     | 0    |
| 0                  | 0      | 1     | 0    |
| 1                  | 0      | 1     | 0    |
| 0                  | 1      | 1     | 0    |
| 1                  | 1      | 1     | 1    |

Sustainability Sources

| Informatics | ResearchOffi | IT | Other | Freq |
|-------------|--------------|----|-------|------|
| 0           | 0            | 0  | 0     | 0    |
| 1           | 0            | 0  | 0     | 17   |
| 0           | 1            | 0  | 0     | 1    |
| 1           | 1            | 0  | 0     | 5    |
| 0           | 0            | 1  | 0     | 0    |
| 1           | 0            | 1  | 0     | 7    |
| 0           | 1            | 1  | 0     | 1    |
| 1           | 1            | 1  | 0     | 6    |
| 0           | 0            | 0  | 1     | 1    |
| 1           | 0            | 0  | 1     | 2    |
| 0           | 1            | 0  | 1     | 0    |
| 1           | 1            | 0  | 1     | 1    |
| 0           | 0            | 1  | 1     | 1    |
| 1           | 0            | 1  | 1     | 0    |
| 0           | 1            | 1  | 1     | 0    |
| 1           | 1            | 1  | 1     | 0    |

Locus of Control

| Institutional | Fees | Grants | Other | Freq |
|---------------|------|--------|-------|------|
| 0             | 0    | 0      | 0     | 0    |
| 1             | 0    | 0      | 0     | 2    |
| 0             | 1    | 0      | 0     | 1    |
| 1             | 1    | 0      | 0     | 2    |
| 0             | 0    | 1      | 0     | 10   |
| 1             | 0    | 1      | 0     | 9    |
| 0             | 1    | 1      | 0     | 5    |
| 1             | 1    | 1      | 0     | 10   |
| 0             | 0    | 0      | 1     | 0    |
| 1             | 0    | 0      | 1     | 0    |
| 0             | 1    | 0      | 1     | 0    |
| 1             | 1    | 0      | 1     | 0    |
| 0             | 0    | 1      | 1     | 2    |
| 1             | 0    | 1      | 1     | 1    |
| 0             | 1    | 1      | 1     | 0    |
| 1             | 1    | 1      | 1     | 0    |

Sustainability Sources

| Informatics | ResearchOffi | IT | Other | Freq |
|-------------|--------------|----|-------|------|
| 0           | 0            | 1  | 0     | 15   |
| 1           | 0            | 1  | 0     | 12   |
| 0           | 1            | 1  | 0     | 2    |
| 1           | 1            | 1  | 0     | 9    |
| 0           | 0            | 1  | 1     | 1    |
| 1           | 0            | 1  | 1     | 2    |
| 0           | 1            | 1  | 1     | 0    |
| 1           | 1            | 1  | 1     | 1    |

Locus of Control

| Institutional | Fees | Grants | Other | Freq |
|---------------|------|--------|-------|------|
| 0             | 0    | 0      | 0     | 0    |
| 1             | 0    | 0      | 0     | 23   |
| 0             | 1    | 0      | 0     | 0    |
| 1             | 1    | 0      | 0     | 2    |
| 0             | 0    | 1      | 0     | 0    |
| 1             | 0    | 1      | 0     | 10   |
| 0             | 1    | 1      | 0     | 0    |
| 1             | 1    | 1      | 0     | 4    |
| 0             | 0    | 0      | 1     | 1    |
| 1             | 0    | 0      | 1     | 1    |
| 0             | 1    | 0      | 1     | 0    |
| 1             | 1    | 0      | 1     | 0    |
| 0             | 0    | 1      | 1     | 0    |
| 1             | 0    | 1      | 1     | 0    |
| 0             | 1    | 1      | 1     | 0    |
| 1             | 1    | 1      | 1     | 1    |

Sustainability Sources

| Informatics | ResearchOffice | IT | Other | Freq |
|-------------|----------------|----|-------|------|
| 0           | 0              | 1  | 0     | 17   |
| 1           | 0              | 1  | 0     | 20   |
| 0           | 1              | 1  | 0     | 1    |
| 1           | 1              | 1  | 0     | 0    |
| 0           | 0              | 1  | 1     | 2    |
| 1           | 0              | 1  | 1     | 2    |
| 0           | 1              | 1  | 1     | 0    |
| 1           | 1              | 1  | 1     | 0    |

Locus of Control

| Institutional Fees | Grants | Other | Freq |
|--------------------|--------|-------|------|
| 0                  | 0      | 0     | 1    |
| 1                  | 0      | 0     | 11   |
| 0                  | 1      | 0     | 0    |
| 1                  | 1      | 0     | 8    |
| 0                  | 0      | 1     | 0    |
| 1                  | 0      | 1     | 9    |
| 0                  | 1      | 1     | 1    |
| 1                  | 1      | 1     | 11   |
| 0                  | 0      | 0     | 0    |
| 1                  | 0      | 0     | 0    |
| 0                  | 1      | 0     | 0    |
| 1                  | 1      | 0     | 1    |
| 0                  | 0      | 1     | 0    |
| 1                  | 0      | 1     | 0    |
| 0                  | 1      | 1     | 0    |
| 1                  | 1      | 1     | 0    |

Sustainability Sources

| Informatics | ResearchOffi | IT | Other | Freq |    |
|-------------|--------------|----|-------|------|----|
| 0           | 0            | 0  | 0     | 0    | 0  |
| 1           | 0            | 0  | 0     | 0    | 2  |
| 0           | 1            | 0  | 0     | 0    | 2  |
| 1           | 1            | 0  | 0     | 0    | 1  |
| 0           | 0            | 1  | 1     | 0    | 7  |
| 1           | 0            | 1  | 1     | 0    | 8  |
| 0           | 1            | 1  | 1     | 0    | 3  |
| 1           | 1            | 1  | 1     | 0    | 12 |
| 0           | 0            | 0  | 0     | 1    | 1  |
| 1           | 0            | 0  | 0     | 1    | 0  |
| 0           | 1            | 1  | 0     | 1    | 0  |
| 1           | 1            | 1  | 0     | 1    | 1  |
| 0           | 0            | 1  | 1     | 1    | 2  |
| 1           | 0            | 1  | 1     | 1    | 1  |
| 0           | 1            | 1  | 1     | 1    | 0  |
| 1           | 1            | 1  | 1     | 1    | 2  |

Locus of Control

| Institutional | Fees | Grants | Other | Freq |    |
|---------------|------|--------|-------|------|----|
| 0             | 0    | 0      | 0     | 0    | 2  |
| 1             | 0    | 0      | 0     | 0    | 27 |
| 0             | 1    | 0      | 0     | 0    | 0  |
| 1             | 1    | 0      | 0     | 0    | 1  |
| 0             | 0    | 1      | 1     | 0    | 0  |
| 1             | 0    | 1      | 1     | 0    | 9  |
| 0             | 1    | 1      | 1     | 0    | 0  |
| 1             | 1    | 1      | 1     | 0    | 1  |
| 0             | 0    | 0      | 0     | 1    | 1  |
| 1             | 0    | 0      | 0     | 1    | 1  |
| 0             | 1    | 1      | 0     | 1    | 0  |
| 1             | 1    | 1      | 0     | 1    | 0  |
| 0             | 0    | 1      | 1     | 1    | 0  |
| 1             | 0    | 1      | 1     | 1    | 0  |
| 0             | 1    | 1      | 1     | 1    | 0  |
| 1             | 1    | 1      | 1     | 1    | 0  |

Sustainability Sources

| Informatics | ResearchOffi | IT | Other | Freq |    |
|-------------|--------------|----|-------|------|----|
| 0           | 0            | 0  | 0     | 0    | 0  |
| 1           | 0            | 0  | 0     | 0    | 11 |
| 0           | 1            | 0  | 0     | 0    | 2  |
| 1           | 1            | 0  | 0     | 0    | 9  |
| 0           | 0            | 1  | 1     | 0    | 0  |
| 1           | 0            | 1  | 1     | 0    | 4  |
| 0           | 1            | 1  | 1     | 0    | 0  |
| 1           | 1            | 1  | 1     | 0    | 6  |
| 0           | 0            | 0  | 0     | 1    | 1  |
| 1           | 0            | 0  | 0     | 1    | 3  |
| 0           | 1            | 1  | 0     | 1    | 0  |
| 1           | 1            | 1  | 0     | 1    | 1  |
| 0           | 0            | 1  | 1     | 1    | 0  |
| 1           | 0            | 1  | 1     | 1    | 1  |
| 0           | 1            | 1  | 1     | 1    | 0  |
| 1           | 1            | 1  | 1     | 1    | 4  |

Locus of Control

| Institutional | Fees | Grants | Other | Freq |    |
|---------------|------|--------|-------|------|----|
| 0             | 0    | 0      | 0     | 0    | 1  |
| 1             | 0    | 0      | 0     | 0    | 14 |
| 0             | 1    | 0      | 0     | 0    | 0  |
| 1             | 1    | 0      | 0     | 0    | 1  |
| 0             | 0    | 1      | 1     | 0    | 2  |
| 1             | 0    | 1      | 1     | 0    | 14 |
| 0             | 1    | 1      | 1     | 0    | 1  |
| 1             | 1    | 1      | 1     | 0    | 3  |
| 0             | 0    | 0      | 0     | 1    | 1  |
| 1             | 0    | 0      | 0     | 1    | 2  |
| 0             | 1    | 1      | 0     | 1    | 1  |
| 1             | 1    | 1      | 0     | 1    | 0  |
| 0             | 0    | 1      | 1     | 1    | 0  |
| 1             | 0    | 1      | 1     | 1    | 2  |
| 0             | 1    | 1      | 1     | 1    | 0  |
| 1             | 1    | 1      | 1     | 1    | 0  |

Sustainability Sources

| Informatics | ResearchOffi | IT | Other | Freq |
|-------------|--------------|----|-------|------|
| 0           | 0            | 0  | 0     | 0    |
| 1           | 0            | 0  | 0     | 22   |
| 0           | 1            | 0  | 0     | 0    |
| 1           | 1            | 0  | 0     | 3    |
| 0           | 0            | 1  | 0     | 0    |
| 1           | 0            | 1  | 0     | 8    |
| 0           | 1            | 1  | 0     | 0    |
| 1           | 1            | 1  | 0     | 0    |
| 0           | 0            | 0  | 1     | 4    |
| 1           | 0            | 0  | 1     | 2    |
| 0           | 1            | 1  | 0     | 0    |
| 1           | 1            | 1  | 0     | 1    |
| 0           | 0            | 1  | 1     | 1    |
| 1           | 0            | 1  | 1     | 1    |
| 0           | 1            | 1  | 1     | 0    |
| 1           | 1            | 1  | 1     | 0    |

Locus of Control

| Institutional | Fees | Grants | Other | Freq |
|---------------|------|--------|-------|------|
| 0             | 0    | 0      | 0     | 3    |
| 1             | 0    | 0      | 0     | 4    |
| 0             | 1    | 0      | 0     | 0    |
| 1             | 1    | 0      | 0     | 0    |
| 0             | 0    | 1      | 0     | 6    |
| 1             | 0    | 1      | 0     | 15   |
| 0             | 1    | 1      | 0     | 3    |
| 1             | 1    | 1      | 0     | 7    |
| 0             | 0    | 0      | 1     | 0    |
| 1             | 0    | 0      | 1     | 1    |
| 0             | 1    | 1      | 0     | 0    |
| 1             | 1    | 0      | 1     | 0    |
| 0             | 0    | 1      | 1     | 0    |
| 1             | 0    | 1      | 1     | 2    |
| 0             | 1    | 1      | 1     | 1    |
| 1             | 1    | 1      | 1     | 0    |

Sustainability Sources
